# Supplementary material
Source: Royal Society of Chemistry journal article supplement (doi:10.1039/d5nr05103g)
Supplement: d5nr05103g1.pdf [file d5nr05103g1.pdf]

**Supplemental information for**  
**“A study on high efficiency phase organization segmentation**  
**model for SEM images based on deep learning”**

Chao Wang <sup>a,b</sup>, Changhao Wang <sup>a\*</sup>, Zhipeng Chang <sup>a</sup>, Xiaopeng Cheng <sup>a</sup>, Xingping Liu <sup>c</sup>,  
Bing Wang <sup>a</sup>, Feihong Chu <sup>b</sup>, Ruzhi Wang <sup>a\*</sup>

<sup>a</sup> Key Laboratory of Advanced Functional Materials of Education Ministry of China, College of Materials Science and Engineering, Beijing University of Technology, Beijing 100124, China

<sup>b</sup> Department of Electrical Engineering, Hebei Vocational University of Technology and Engineering, Xingtai 054000, China

<sup>c</sup> Department of Biomedical Engineering, University of California Irvine, Irvine, 92697,  
United States of America

Table. S1 IoU values for all images in the validation set

| Serial Number | Image File Name                               | IoU    |
|---------------|-----------------------------------------------|--------|
| 1             | czp-2-12-5kx_block_10_rotated_270.png         | 0.9734 |
| 2             | czp-2-12-5kx_block_11_rotated_90.png          | 0.917  |
| 3             | czp-2-12-5kx_block_12_rotated_180_flipped.png | 0.8976 |
| 4             | czp-2-12-5kx_block_12_rotated_270.png         | 0.8717 |
| 5             | czp-2-12-5kx_block_13.png                     | 0.9099 |
| 6             | czp-2-12-5kx_block_13_rotated_180_flipped.png | 0.9078 |
| 7             | czp-2-12-5kx_block_14_rotated_180.png         | 0.9228 |
| 8             | czp-2-12-5kx_block_15_rotated_270.png         | 0.9385 |
| 9             | czp-2-12-5kx_block_15_rotated_90_flipped.png  | 0.9364 |
| 10            | czp-2-12-5kx_block_16_rotated_270_flipped.png | 0.9798 |
| 11            | czp-2-12-5kx_block_17.png                     | 0.9278 |
| 12            | czp-2-12-5kx_block_17_rotated_270_flipped.png | 0.8905 |
| 13            | czp-2-12-5kx_block_18_rotated_270.png         | 0.8895 |
| 14            | czp-2-12-5kx_block_18_rotated_270_flipped.png | 0.8597 |
| 15            | czp-2-12-5kx_block_20_rotated_180_flipped.png | 0.9523 |
| 16            | czp-2-12-5kx_block_22.png                     | 0.9618 |
| 17            | czp-2-12-5kx_block_23.png                     | 0.885  |
| 18            | czp-2-12-5kx_block_23_flipped.png             | 0.8718 |
| 19            | czp-2-12-5kx_block_23_rotated_180.png         | 0.8763 |
| 20            | czp-2-12-5kx_block_23_rotated_180_flipped.png | 0.8675 |
| 21            | czp-2-12-5kx_block_24.png                     | 0.9494 |
| 22            | czp-2-12-5kx_block_24_rotated_270_flipped.png | 0.8672 |

\* Corresponding author. *E-mail address*: wangch33@bjut.edu.cn; wrz@bjut.edu.cn

|    |                                               |        |
|----|-----------------------------------------------|--------|
| 23 | czp-2-12-5kx_block_25_rotated_180.png         | 0.901  |
| 24 | czp-2-12-5kx_block_27_rotated_90_flipped.png  | 0.9567 |
| 25 | czp-2-12-5kx_block_28_rotated_270.png         | 0.9722 |
| 26 | czp-2-12-5kx_block_30_rotated_90_flipped.png  | 0.9659 |
| 27 | czp-2-12-5kx_block_31_flipped.png             | 0.9678 |
| 28 | czp-2-12-5kx_block_32_rotated_180.png         | 0.7193 |
| 29 | czp-2-12-5kx_block_32_rotated_270.png         | 0.7825 |
| 30 | czp-2-12-5kx_block_33.png                     | 0.9488 |
| 31 | czp-2-12-5kx_block_34.png                     | 0.9642 |
| 32 | czp-2-12-5kx_block_35_rotated_180_flipped.png | 0.9657 |
| 33 | czp-2-12-5kx_block_35_rotated_270.png         | 0.9577 |
| 34 | czp-2-12-5kx_block_35_rotated_90_flipped.png  | 0.9651 |
| 35 | czp-2-12-5kx_block_37_rotated_90.png          | 0.7882 |
| 36 | czp-2-12-5kx_block_37_rotated_90_flipped.png  | 0.7812 |
| 37 | czp-2-12-5kx_block_38_rotated_180.png         | 0.9401 |
| 38 | czp-2-12-5kx_block_38_rotated_180_flipped.png | 0.9421 |
| 39 | czp-2-12-5kx_block_38_rotated_90.png          | 0.9446 |
| 40 | czp-2-12-5kx_block_39_flipped.png             | 0.9225 |
| 41 | czp-2-12-5kx_block_39_rotated_180_flipped.png | 0.9226 |
| 42 | czp-2-12-5kx_block_39_rotated_270.png         | 0.9247 |
| 43 | czp-2-12-5kx_block_39_rotated_270_flipped.png | 0.9245 |
| 44 | czp-2-12-5kx_block_40.png                     | 0.8122 |
| 45 | czp-2-12-5kx_block_40_rotated_270.png         | 0.4827 |
| 46 | czp-2-12-5kx_block_40_rotated_90_flipped.png  | 0.7359 |
| 47 | czp-2-12-5kx_block_41_rotated_180.png         | 0.8881 |
| 48 | czp-2-12-5kx_block_41_rotated_270_flipped.png | 0.8995 |
| 49 | czp-2-12-5kx_block_41_rotated_90.png          | 0.8675 |
| 50 | czp-2-12-5kx_block_42_rotated_90_flipped.png  | 0.8956 |
| 51 | czp-2-12-5kx_block_43.png                     | 0.9665 |
| 52 | czp-2-12-5kx_block_43_rotated_180.png         | 0.9657 |
| 53 | czp-2-12-5kx_block_43_rotated_90.png          | 0.9665 |
| 54 | czp-2-12-5kx_block_44.png                     | 0.9311 |
| 55 | czp-2-12-5kx_block_44_rotated_270.png         | 0.9351 |
| 56 | czp-2-12-5kx_block_45.png                     | 0.9144 |
| 57 | czp-2-12-5kx_block_45_flipped.png             | 0.9114 |
| 58 | czp-2-12-5kx_block_45_rotated_180.png         | 0.9184 |
| 59 | czp-2-12-5kx_block_45_rotated_270.png         | 0.9165 |
| 60 | czp-2-12-5kx_block_45_rotated_270_flipped.png | 0.9239 |
| 61 | czp-2-12-5kx_block_46_rotated_90_flipped.png  | 0.8634 |
| 62 | czp-2-12-5kx_block_47_rotated_270.png         | 0.9464 |
| 63 | czp-2-12-5kx_block_47_rotated_90_flipped.png  | 0.9406 |
| 64 | czp-2-12-5kx_block_5_rotated_90.png           | 0.9192 |
| 65 | czp-2-12-5kx_block_7_flipped.png              | 0.9457 |

|               |                                             |        |
|---------------|---------------------------------------------|--------|
| 66            | czp-2-12-5kx_block_7_rotated_90_flipped.png | 0.9554 |
| 67            | czp-2-12-5kx_block_8.png                    | 0.8973 |
| 68            | czp-2-12-5kx_block_8_rotated_90_flipped.png | 0.9152 |
| 69            | czp-2-12-5kx_block_9_rotated_90_flipped.png | 0.9317 |
| Average value |                                             | 0.9052 |

Table.S2 PA values for all images in the validation set

| Serial Number | Image File Name                               | PA     |
|---------------|-----------------------------------------------|--------|
| 1             | czp-2-12-5kx_block_10_rotated_270.png         | 0.9936 |
| 2             | czp-2-12-5kx_block_11_rotated_90.png          | 0.9952 |
| 3             | czp-2-12-5kx_block_12_rotated_180_flipped.png | 0.9857 |
| 4             | czp-2-12-5kx_block_12_rotated_270.png         | 0.9811 |
| 5             | czp-2-12-5kx_block_13.png                     | 0.9897 |
| 6             | czp-2-12-5kx_block_13_rotated_180_flipped.png | 0.9898 |
| 7             | czp-2-12-5kx_block_14_rotated_180.png         | 0.9936 |
| 8             | czp-2-12-5kx_block_15_rotated_270.png         | 0.9878 |
| 9             | czp-2-12-5kx_block_15_rotated_90_flipped.png  | 0.9875 |
| 10            | czp-2-12-5kx_block_16_rotated_270_flipped.png | 0.9947 |
| 11            | czp-2-12-5kx_block_17.png                     | 0.9784 |
| 12            | czp-2-12-5kx_block_17_rotated_270_flipped.png | 0.9654 |
| 13            | czp-2-12-5kx_block_18_rotated_270.png         | 0.956  |
| 14            | czp-2-12-5kx_block_18_rotated_270_flipped.png | 0.9444 |
| 15            | czp-2-12-5kx_block_20_rotated_180_flipped.png | 0.9935 |
| 16            | czp-2-12-5kx_block_22.png                     | 0.9852 |
| 17            | czp-2-12-5kx_block_23.png                     | 0.9874 |
| 18            | czp-2-12-5kx_block_23_flipped.png             | 0.9861 |
| 19            | czp-2-12-5kx_block_23_rotated_180.png         | 0.9864 |
| 20            | czp-2-12-5kx_block_23_rotated_180_flipped.png | 0.9853 |
| 21            | czp-2-12-5kx_block_24.png                     | 0.9886 |
| 22            | czp-2-12-5kx_block_24_rotated_270_flipped.png | 0.9671 |
| 23            | czp-2-12-5kx_block_25_rotated_180.png         | 0.9813 |
| 24            | czp-2-12-5kx_block_27_rotated_90_flipped.png  | 0.9903 |
| 25            | czp-2-12-5kx_block_28_rotated_270.png         | 0.9891 |
| 26            | czp-2-12-5kx_block_30_rotated_90_flipped.png  | 0.9848 |
| 27            | czp-2-12-5kx_block_31_flipped.png             | 0.9938 |
| 28            | czp-2-12-5kx_block_32_rotated_180.png         | 0.9928 |
| 29            | czp-2-12-5kx_block_32_rotated_270.png         | 0.9946 |
| 30            | czp-2-12-5kx_block_33.png                     | 0.9918 |
| 31            | czp-2-12-5kx_block_34.png                     | 0.9873 |
| 32            | czp-2-12-5kx_block_35_rotated_180_flipped.png | 0.996  |
| 33            | czp-2-12-5kx_block_35_rotated_270.png         | 0.9953 |
| 34            | czp-2-12-5kx_block_35_rotated_90_flipped.png  | 0.9963 |

|               |                                               |        |
|---------------|-----------------------------------------------|--------|
| 35            | czp-2-12-5kx_block_37_rotated_90.png          | 0.979  |
| 36            | czp-2-12-5kx_block_37_rotated_90_flipped.png  | 0.9781 |
| 37            | czp-2-12-5kx_block_38_rotated_180.png         | 0.9798 |
| 38            | czp-2-12-5kx_block_38_rotated_180_flipped.png | 0.9808 |
| 39            | czp-2-12-5kx_block_38_rotated_90.png          | 0.9814 |
| 40            | czp-2-12-5kx_block_39_flipped.png             | 0.9881 |
| 41            | czp-2-12-5kx_block_39_rotated_180_flipped.png | 0.9882 |
| 42            | czp-2-12-5kx_block_39_rotated_270.png         | 0.9876 |
| 43            | czp-2-12-5kx_block_39_rotated_270_flipped.png | 0.9874 |
| 44            | czp-2-12-5kx_block_40.png                     | 0.9825 |
| 45            | czp-2-12-5kx_block_40_rotated_270.png         | 0.9498 |
| 46            | czp-2-12-5kx_block_40_rotated_90_flipped.png  | 0.9739 |
| 47            | czp-2-12-5kx_block_41_rotated_180.png         | 0.9959 |
| 48            | czp-2-12-5kx_block_41_rotated_270_flipped.png | 0.9965 |
| 49            | czp-2-12-5kx_block_41_rotated_90.png          | 0.995  |
| 50            | czp-2-12-5kx_block_42_rotated_90_flipped.png  | 0.9861 |
| 51            | czp-2-12-5kx_block_43.png                     | 0.9834 |
| 52            | czp-2-12-5kx_block_43_rotated_180.png         | 0.9828 |
| 53            | czp-2-12-5kx_block_43_rotated_90.png          | 0.9832 |
| 54            | czp-2-12-5kx_block_44.png                     | 0.9919 |
| 55            | czp-2-12-5kx_block_44_rotated_270.png         | 0.9928 |
| 56            | czp-2-12-5kx_block_45.png                     | 0.9815 |
| 57            | czp-2-12-5kx_block_45_flipped.png             | 0.9812 |
| 58            | czp-2-12-5kx_block_45_rotated_180.png         | 0.9829 |
| 59            | czp-2-12-5kx_block_45_rotated_270.png         | 0.9817 |
| 60            | czp-2-12-5kx_block_45_rotated_270_flipped.png | 0.9835 |
| 61            | czp-2-12-5kx_block_46_rotated_90_flipped.png  | 0.9829 |
| 62            | czp-2-12-5kx_block_47_rotated_270.png         | 0.9817 |
| 63            | czp-2-12-5kx_block_47_rotated_90_flipped.png  | 0.9793 |
| 64            | czp-2-12-5kx_block_5_rotated_90.png           | 0.9881 |
| 65            | czp-2-12-5kx_block_7_flipped.png              | 0.9674 |
| 66            | czp-2-12-5kx_block_7_rotated_90_flipped.png   | 0.9734 |
| 67            | czp-2-12-5kx_block_8.png                      | 0.9907 |
| 68            | czp-2-12-5kx_block_8_rotated_90_flipped.png   | 0.9925 |
| 69            | czp-2-12-5kx_block_9_rotated_90_flipped.png   | 0.9895 |
| Average value |                                               | 0.9846 |

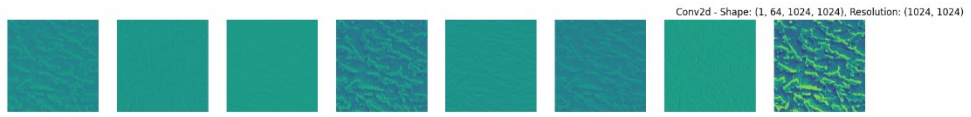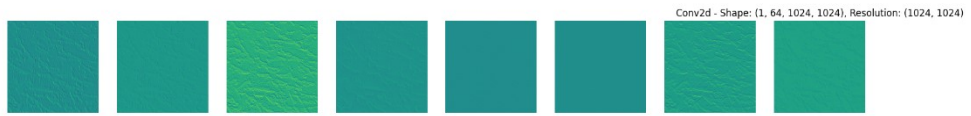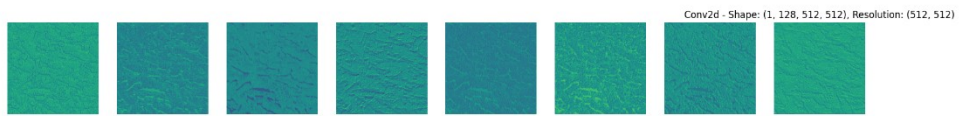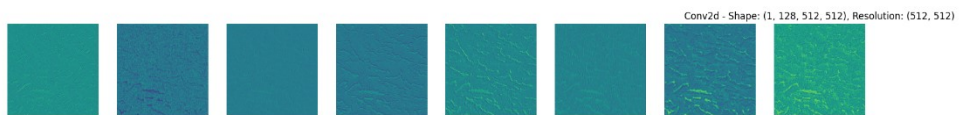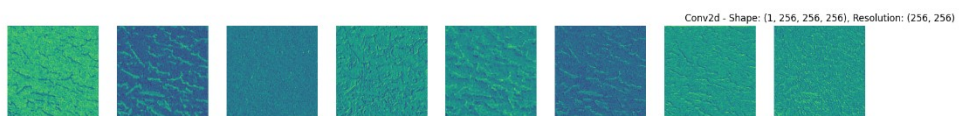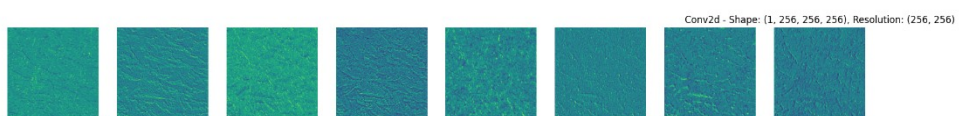

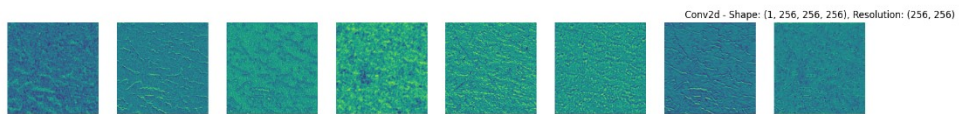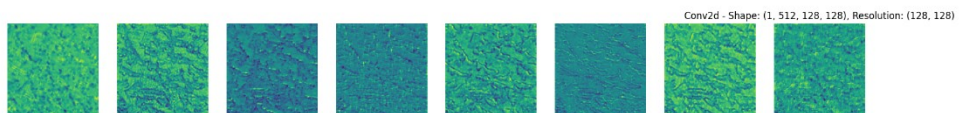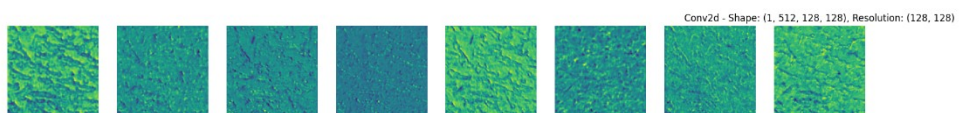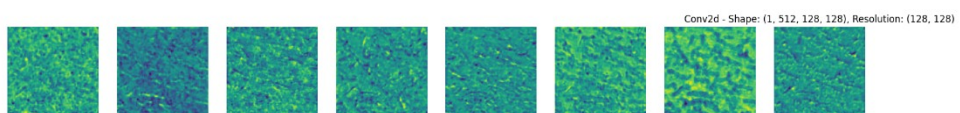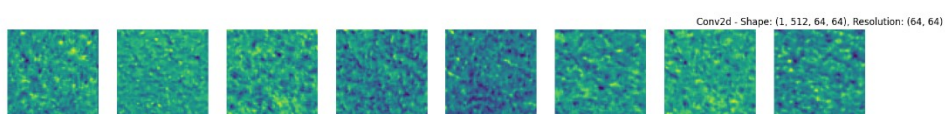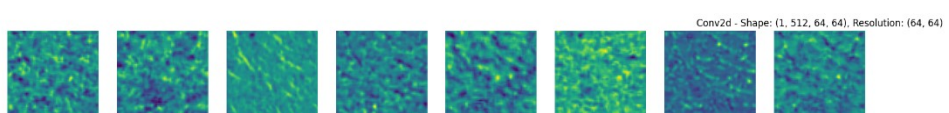

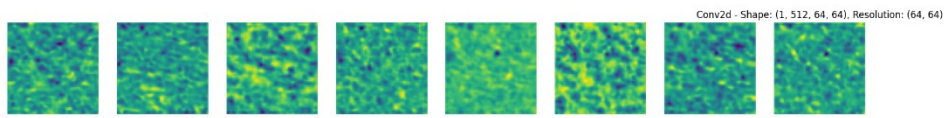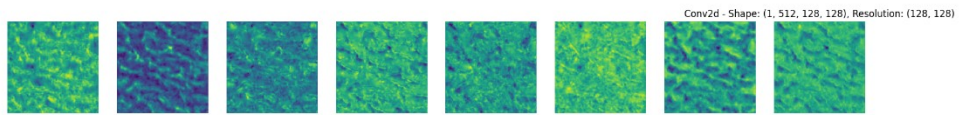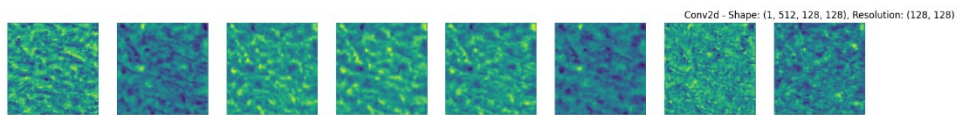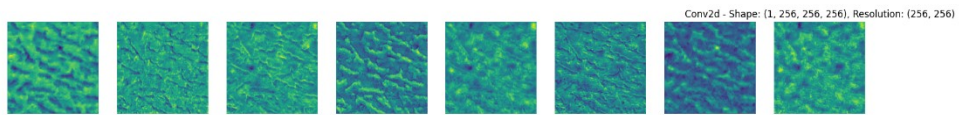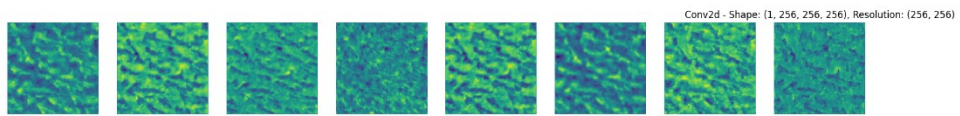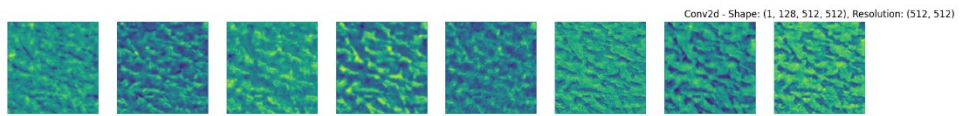

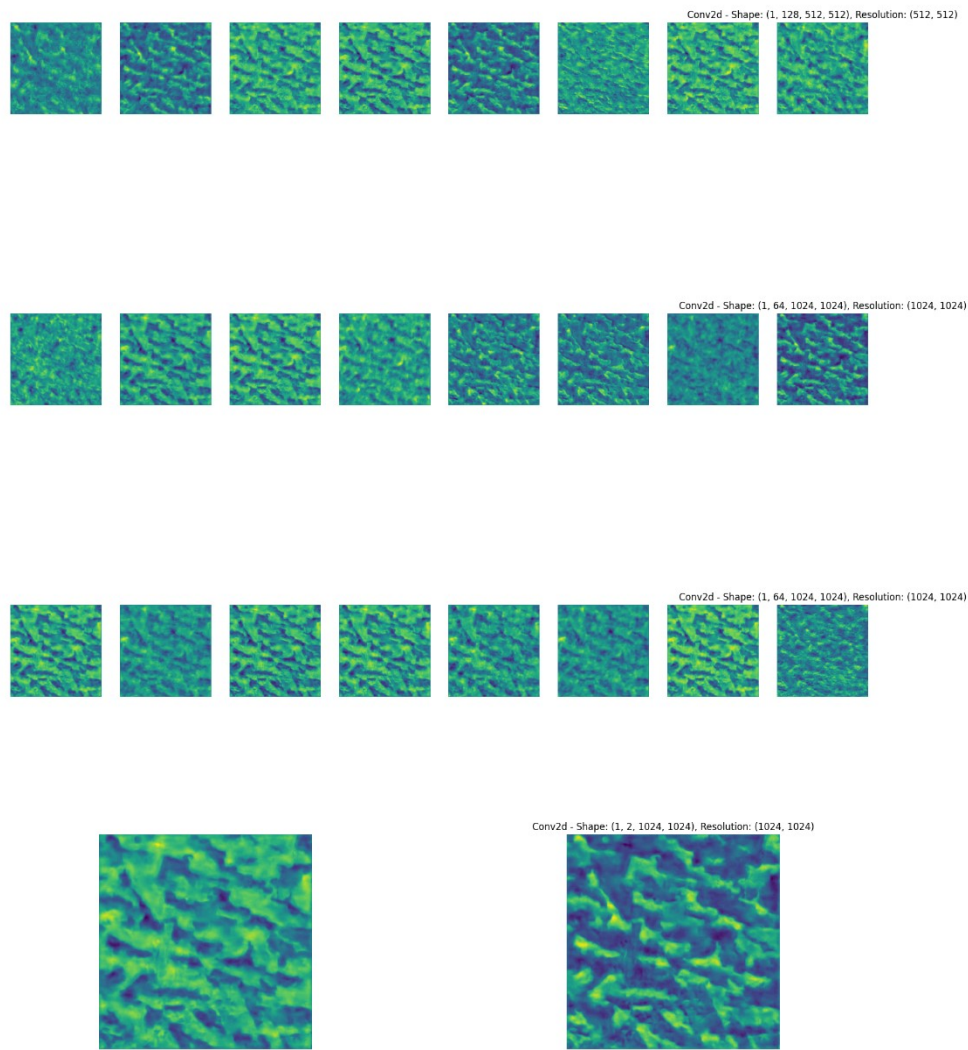

Fig. S1 All intermediate features extracted by the convolutional layer.

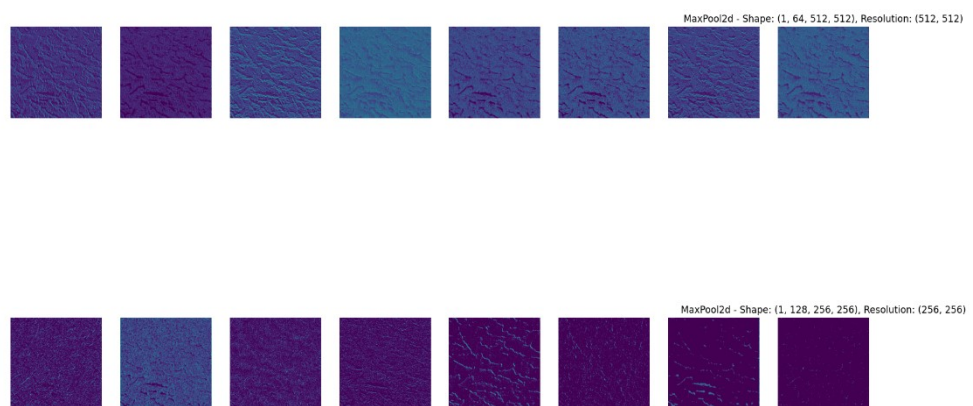

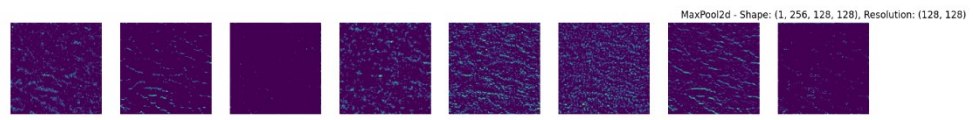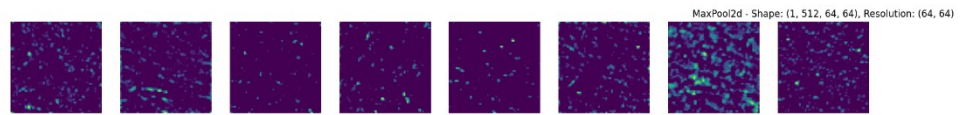

Fig. S2 All intermediate features of the maximum pooling layer.

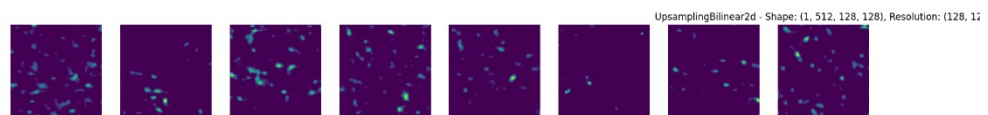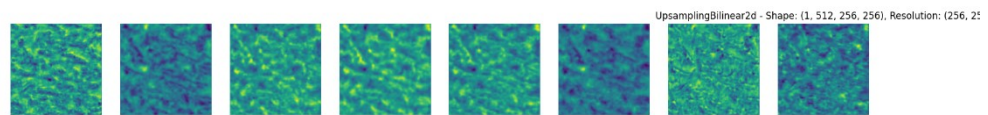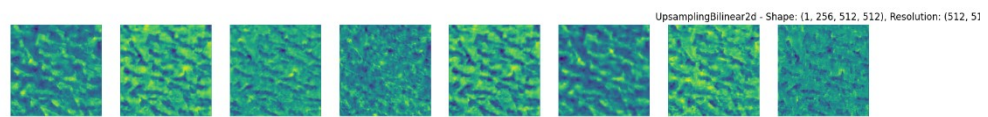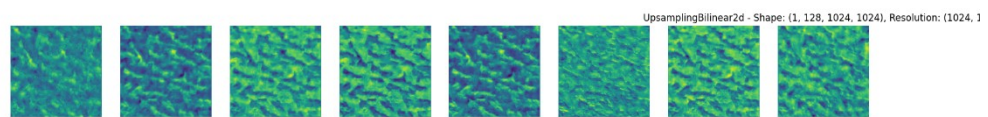

Fig. S3 All intermediate features in the upsampling layer.
